# Supplementary material for: Deactivation of Mn/TiO2 catalyst for NH3-SCR reaction: effect of phosphorous
Source: Royal Society of Chemistry journal article supplement (doi:10.1039/c5ra27713b), 2016-01-01
Supplement: c5ra27713b1.pdf [file c5ra27713b1.pdf]

*Electronic Supplementary Information (ESI)*

Deactivation of Mn/TiO<sub>2</sub> catalyst for NH<sub>3</sub>-SCR reaction: Effect of phosphorous

Ning-zhi Yang<sup>a,b</sup>, Rui-tang Guo<sup>a,b\*</sup>, Qing-shan Wang<sup>a,b</sup>, Wei-guo Pan<sup>a,b\*</sup>, Qi-lin Chen<sup>a,b</sup>,

Chen-zi Lu<sup>a,b</sup>, Shu-xian Wang<sup>a,b</sup>

a. School of Energy Source and Mechanical Engineering, Shanghai University of Electric Power,

Shanghai, P. R. China; Email:grta@zju.edu.cn

b. Shanghai Engineering Research Center of Power Generation Environment Protection,

Shanghai, P. R. China

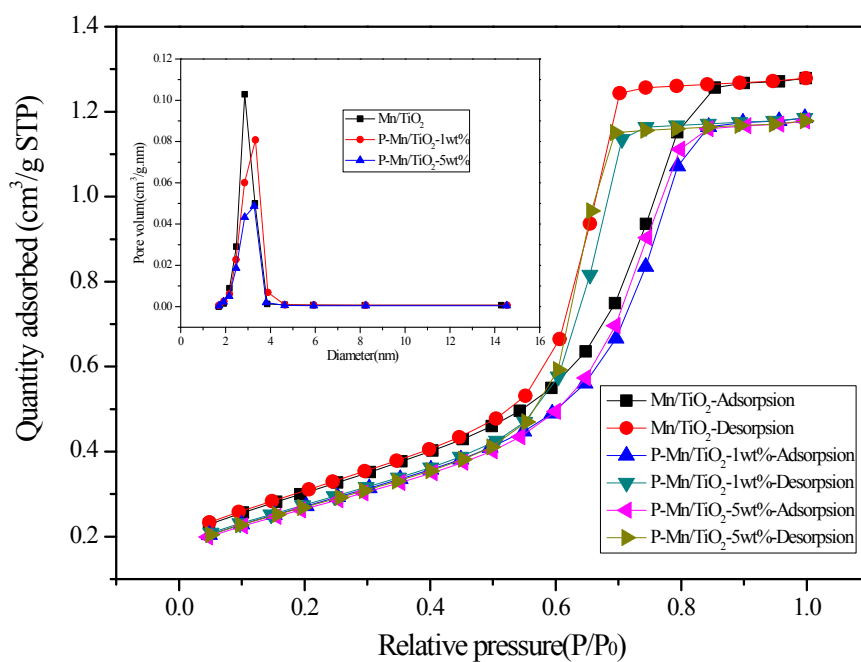

Fig. S1 N<sub>2</sub> adsorption/desorption isotherms and pore size distributions of the three catalyst samples

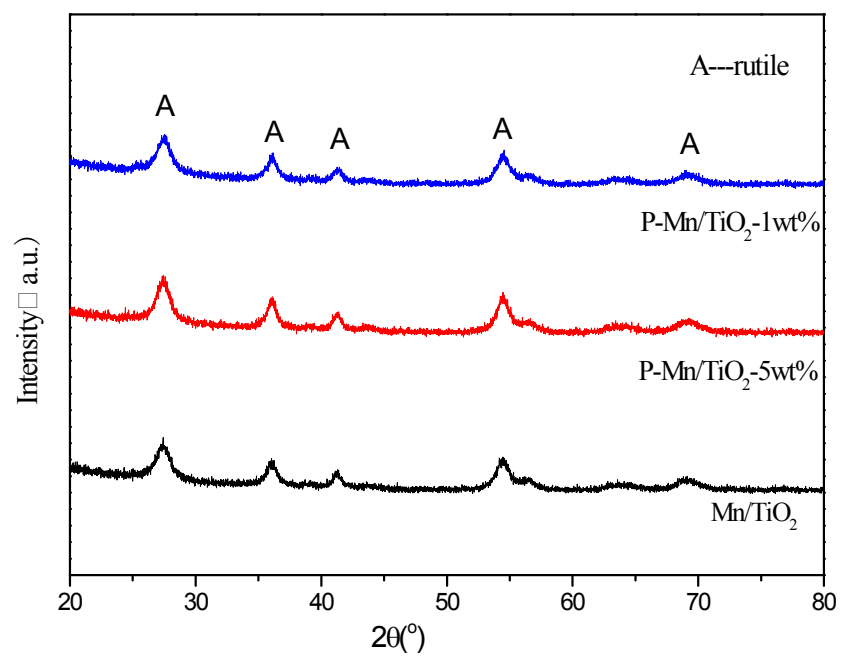

Fig.S2 XRD patterns of the three catalyst samples
